# Supplementary material
Source: PubMed Central journal article supplement (PMC8090960)
Supplement: IAI.00626-20-s0001.pdf [file IAI.00626-20-s0001.pdf]

## SUPPLEMENTAL MATERIAL

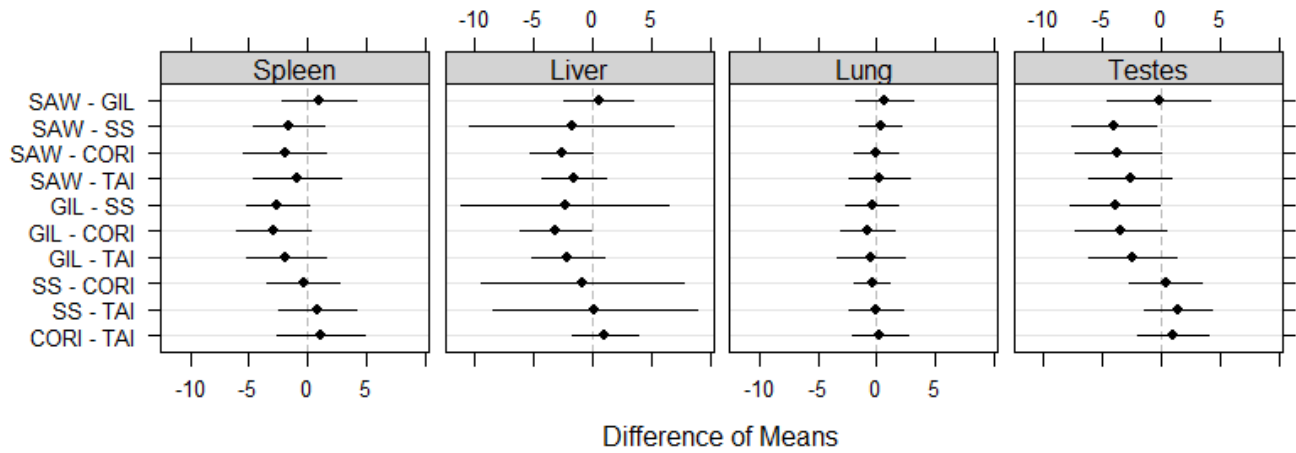

**Supplemental figure S1 – *Rickettsia rickettsii* load differences among tissues.** Pairwise isolate differences (95% confidential interval - CI) of estimated mean log(qPCR) by tissue. CIs are adjusted for multiple comparisons and multiple imputation. Sawtooth (SAW), Gila (GIL), Sheila Smith<sup>T</sup> (SS), Costa Rica (CORI) and Taiacu (TAI).
