# Supplementary material
Source: PubMed Central journal article supplement (PMC8090960)
Supplement: IAI.00626-20-s0002.pdf [file IAI.00626-20-s0002.pdf]

## SUPPLEMENTAL MATERIAL

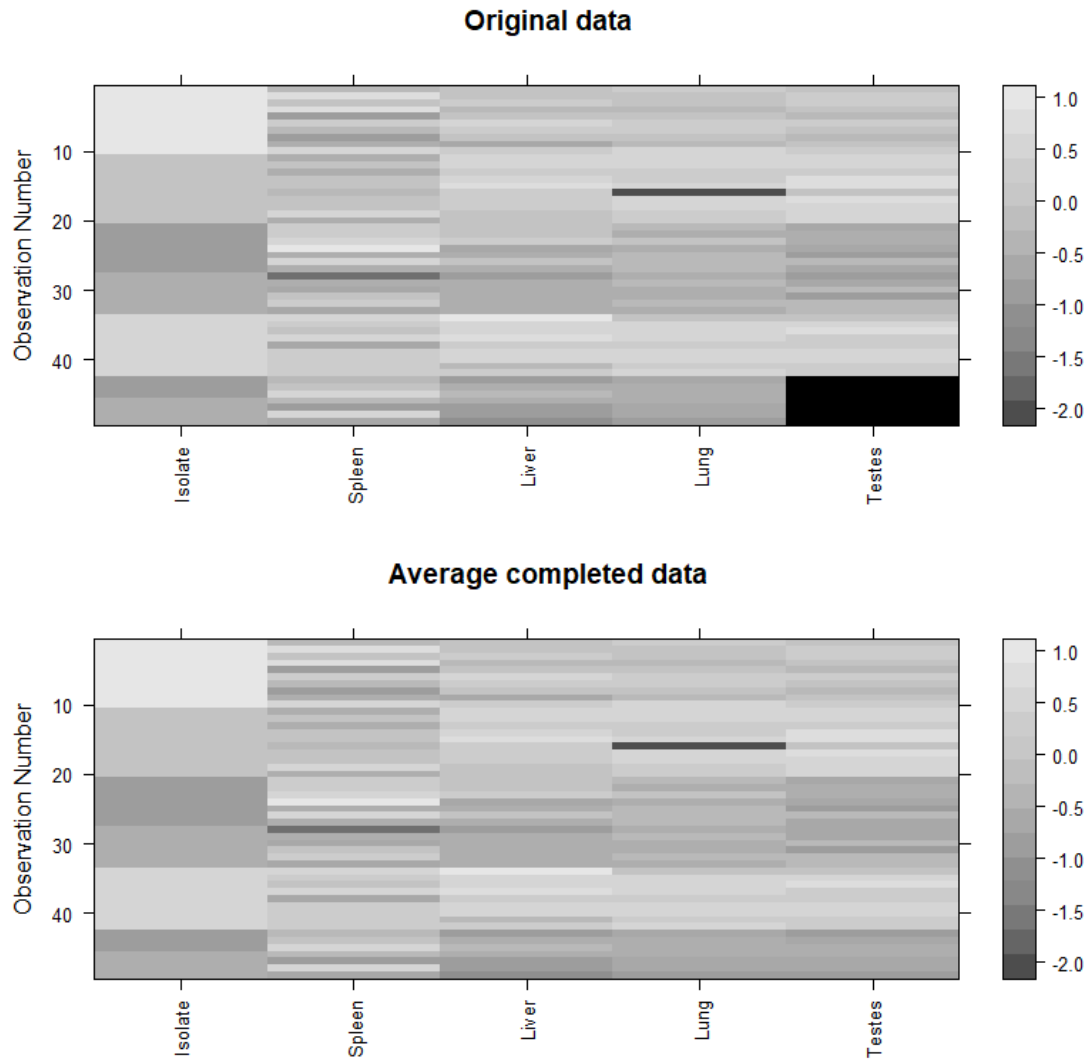

**Supplemental figure S2 – Rickettsial loads log(qPCR value) in spleen, liver, lung and testes of all isolates.** Original data are shown in the top panel, with missing data colored solid black; the average of the multiply imputed data is shown in the bottom panel.
